# Supplementary material for: Exploring the boundaries of a light-driven molecular motor design: new sterically overcrowded alkenes with preferred direction of rotationElectronic supplementary information (ESI) available: a table to convert the labels in the X-ray structure used in the paper and the cif-files. See http://www.rsc.org/suppdata/ob/b4/b402222j/
Source: Royal Society of Chemistry journal article supplement (doi:10.1039/b402222j), 2004-01-01
Supplement: b402222j.pdf [file b402222j.pdf]

# Exploring the boundaries of a light-driven molecular motor design: new sterically overcrowded alkenes with preferred direction of rotation

Richard A. van Delden, Matthijs K. J. ter Wiel, Harmen de Jong, Auke Meetsma and Ben L. Feringa\*

*Department of Organic and Molecular Inorganic Chemistry, Stratingh Institute, University of Groningen, Nijenborgh 4, 9747 AG, Groningen, The Netherlands.*

## Supplementary data

The numbering of the atoms adopted in the X-ray structure in this paper is according to IUPAC rules. Since this numbering is different from the cif-file a conversion table is included.

**Table 1.** Conversion table needed for compound **2**.

| IUPAC | cif-file |
|-------|----------|
|       |          |
| C1    | C17      |
| C2    | C18      |
| C3    | C19      |
| C4    | C20      |
| C4a   | C21      |
| C5    | C23      |
| C6    | C24      |
| C7    | C25      |
| C8    | C26      |
| C8a   | C27      |
| C9    | C15      |
| C9a   | C16      |
| S10   | S2       |
| C10a  | C22      |
|       |          |
| C1'   | C11      |
| C2'   | C12      |
| C3'   | C13      |
| C3'Me | C14      |
| S4'   | S1       |
| C4'a  | C1       |
| C5'   | C2       |
| C6'   | C3       |
| C6'a  | C4       |
| C7'   | C5       |
| C8'   | C6       |
| C9'   | C7       |
| C10'  | C8       |
| C10'a | C9       |
| C10'b | C10      |
